# Supplementary material for: Overexpression of miRNA-93-5p Promotes Proliferation and Migration of Bladder Urothelial Carcinoma via Inhibition of KLF9
Source: Hindawi journal article supplement (doi:10.1155/2022/8911343), 2022-03-09
Supplement: f1 [file 8911343.f1.docx]

**Supplementary Fig. 1**


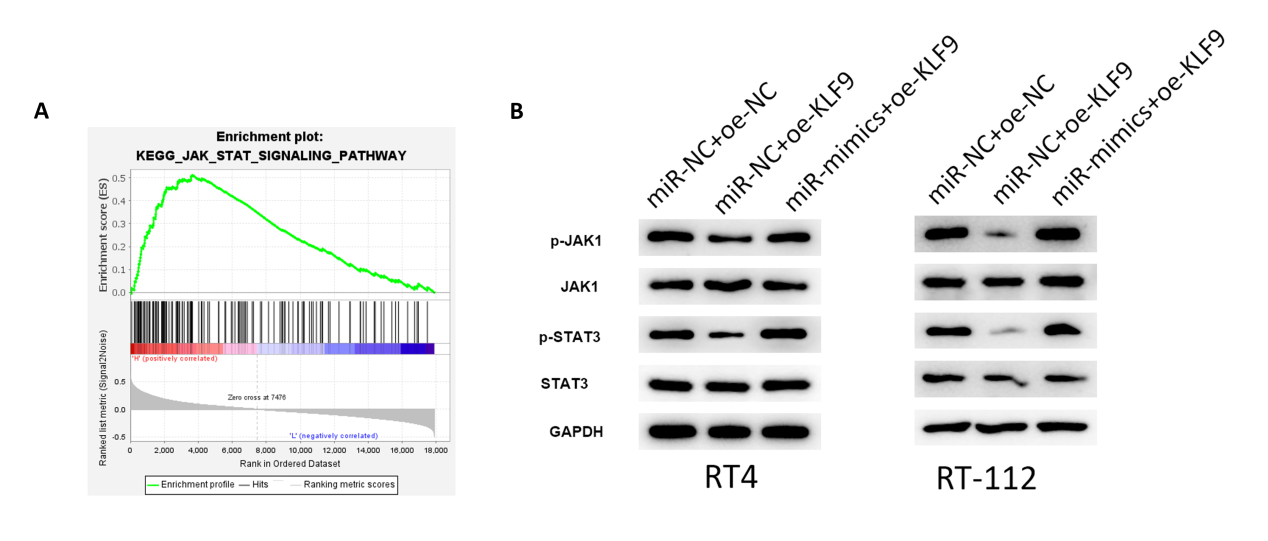


**Supplementary Fig. 1 JAK/STAT3 pathway mediated by miRNA-93-5p/KLF9**

(A) Enrichment of KLF9 in JAK/STAT3; (B) Levels of JAK/STAT3 pathway-related proteins in each group.
